# Supplementary figures and images for: Prediction of Immunotherapy Response in Melanoma through Combined Modeling of Neoantigen Burden and Immune-Related Resistance Mechanisms
Source: PubMed Central journal article supplement — Clin Cancer Res. 2021 Aug 2;27(15):4265–76. doi: 10.1158/1078-0432.CCR-20-4314 (PMC9401549; doi:10.1158/1078-0432.ccr-20-4314), 2021-08-02

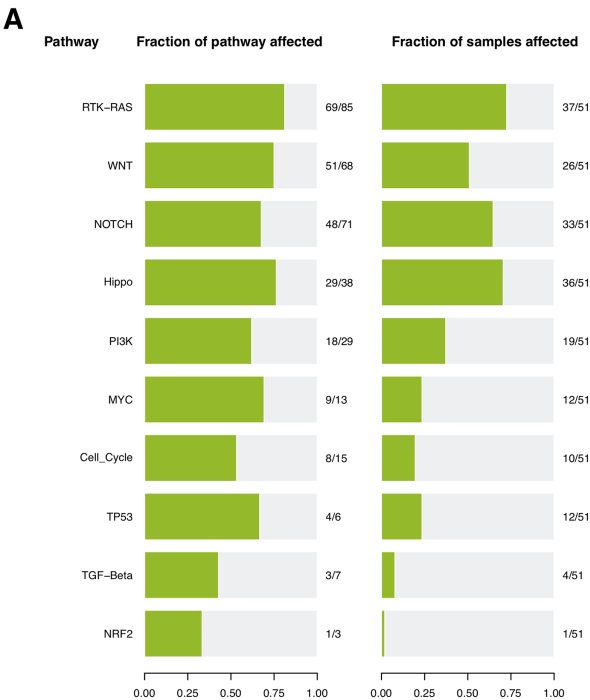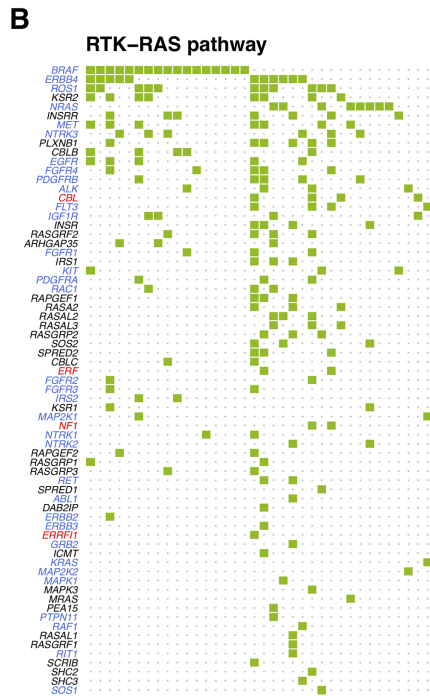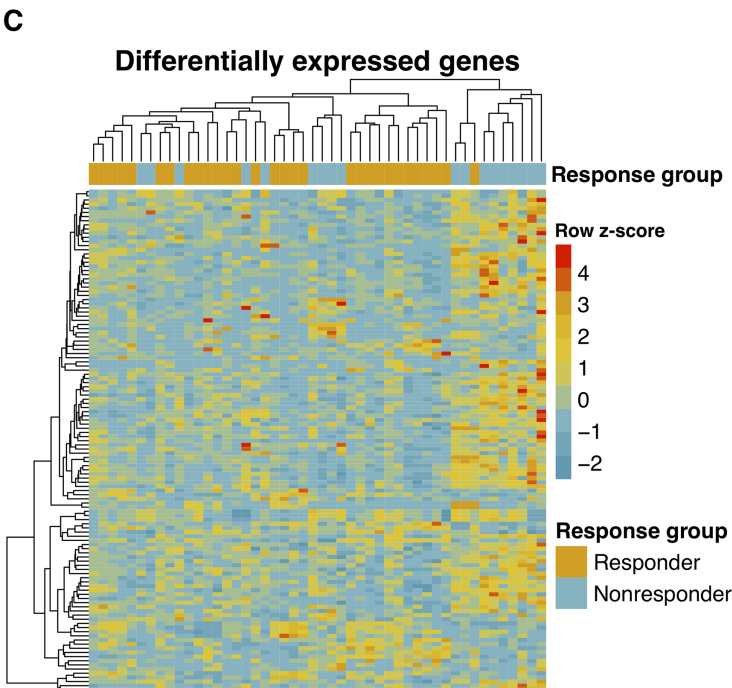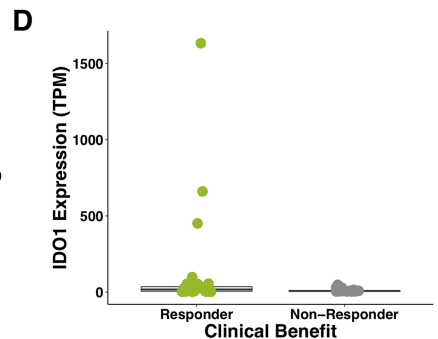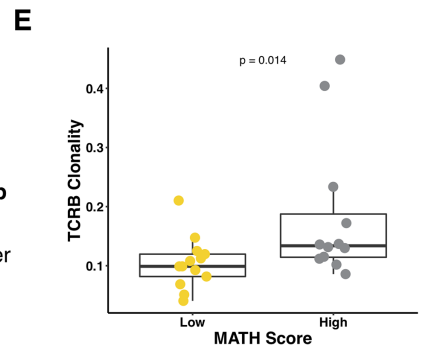

Supplement: ccr-20-4314_figure_s1_suppfs1.pdf [file ccr-20-4314_figure_s1_suppfs1.pdf]
